WITHDRAWN ARTICLE

## WITHDRAWN: SIK2 Promotes Cisplatin Resistance Induced by Aerobic Glycolysis in Breast Cancer Cells through PI3K/AKT/mTOR Signaling Pathway

*Shoukai Zong, Wei Dai, Wencheng Fang, Xiangting Guo, Kai Wang*

Bioscience Reports (2020), BSR20201302; **DOI:** 10.1042/BSR20201302

The Accepted Manuscript version of this article (published on 27 May 2020) was withdrawn on 12 June 2020 due to concerns over authorship.
